# Supplementary material for: The Inhibition of Gastric Cancer Cells’ Progression by 23,24-Dihydrocucurbitacin E through Disruption of the Ras/Raf/ERK/MMP9 Signaling Pathway
Source: MDPI journal article supplement (doi:10.3390/molecules27092697), 2022-04-22
Supplement: s1 [file s1]

# **The Inhibition of Gastric Cancer Cells' Progression by 23,24-Dihydrocucurbitacin E through Disruption of the Ras/Raf/ERK/MMP9 Signaling Pathway**

Huiping Liu, Huijuan Wang, Aijun Dong, Xiaoshuang Huo, Huaxiang Wang,

Junchi Wang\*, Jianyong Si\*

The Key Laboratory of Bioactive Substances and Resources Utilization of Chinese Herbal Medicine, Ministry of Education, Institute of Medicinal Plant Development, Chinese Academy of Medical Sciences & Peking Union Medical College, Beijing, 100193, China; 118610817598@163.com (H.L.); whj200428@163.com (H.W.); daj0938@163.com (A.D.); 13552646119@163.com (X.H.); whx9905@163.com (H.W.)

\*Correspondence: jcwang@implad.ac.cn (J.W.); jysi@implad.ac.cn (J.S.)

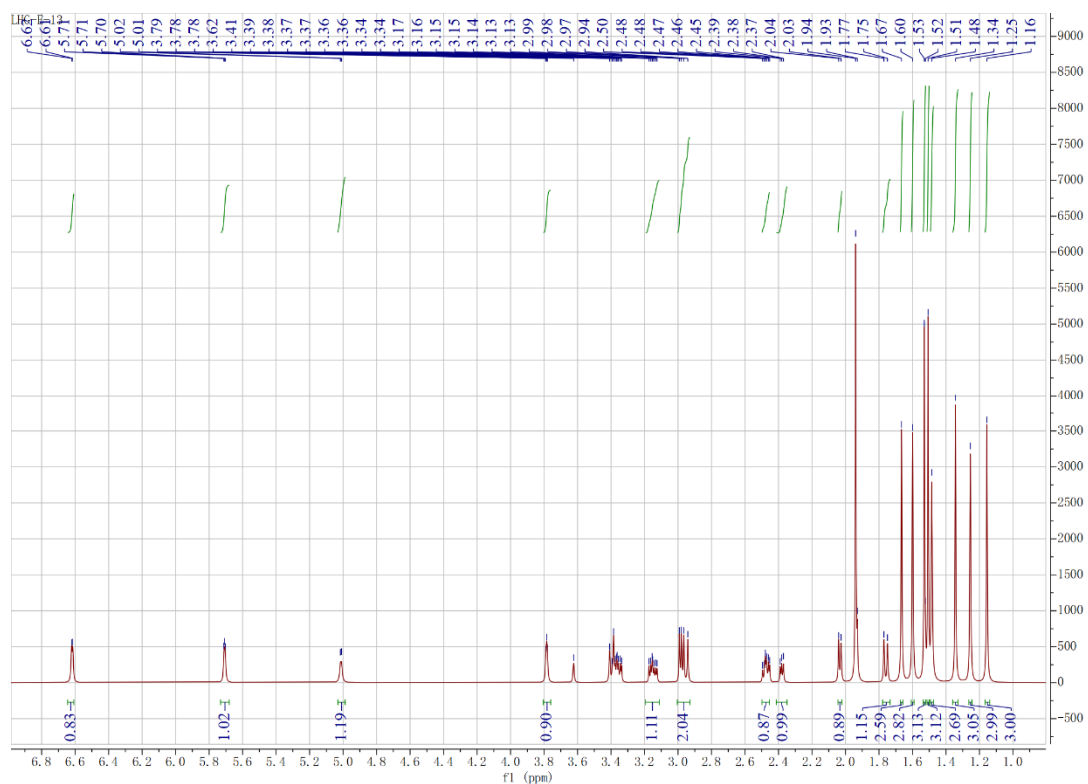

**Figure S1**  $^1\text{H}$ -NMR (600 MHz, pyridine- $d_5$ ) spectrum of 23,24-dihydrocucurbitacin E

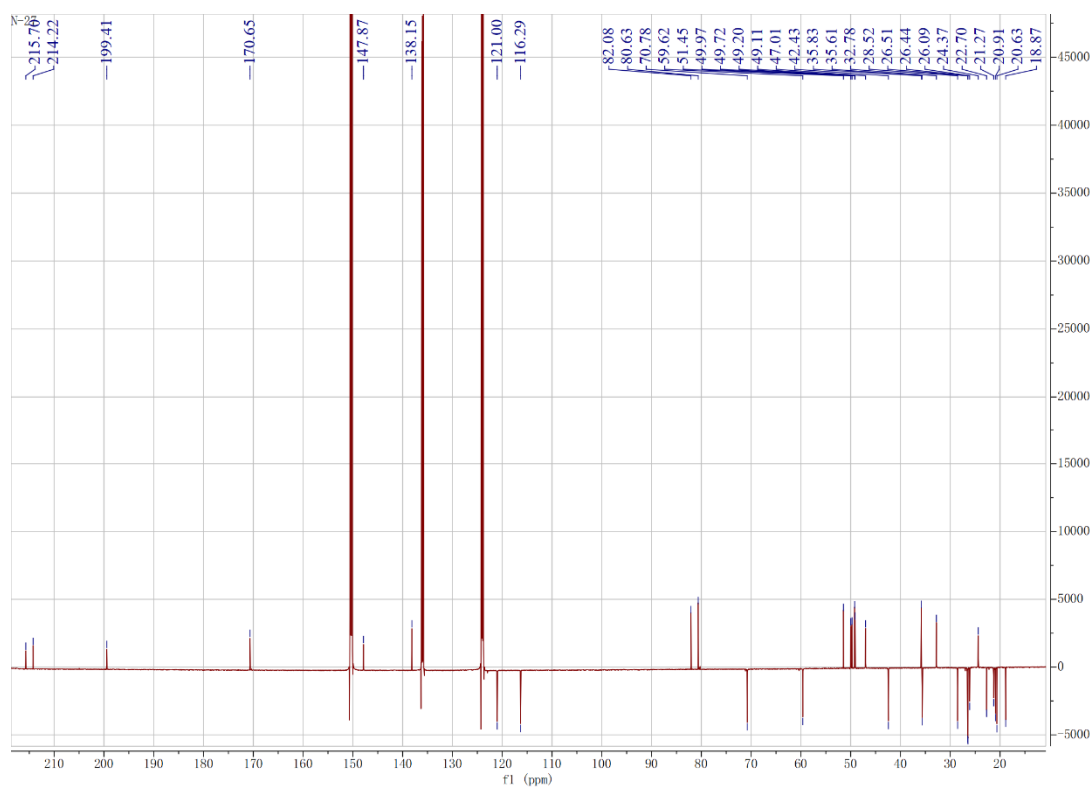

**Figure S2**  $^{13}\text{C}$ -APT (150 MHz, pyridine- $d_5$ ) spectrum of 23,24-dihydrocucurbitacin E

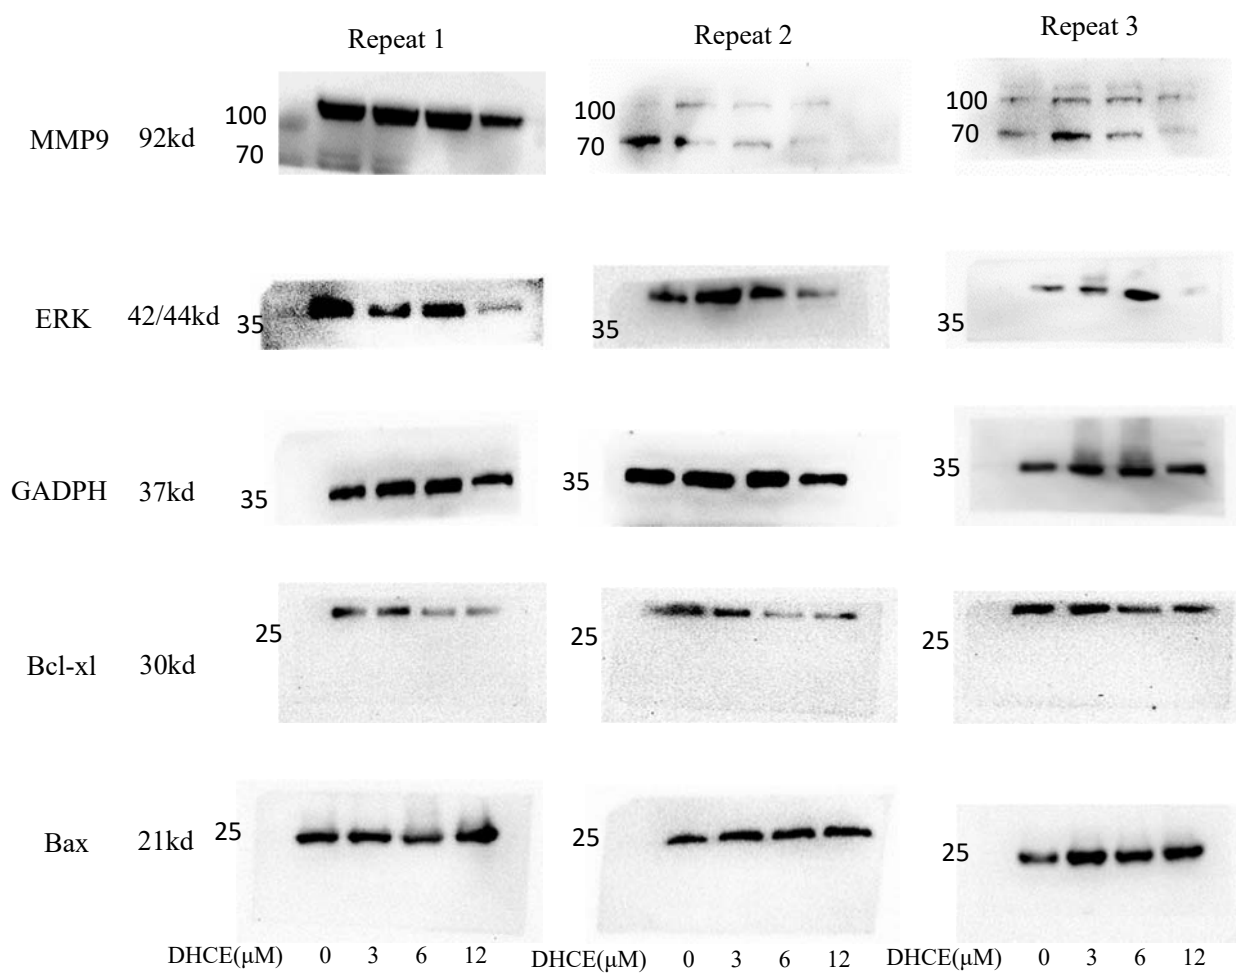

**Figure S3** Original western blots images of MMP9, ERK, Bcl-xl and Bax in MGC803 cells (n=3).

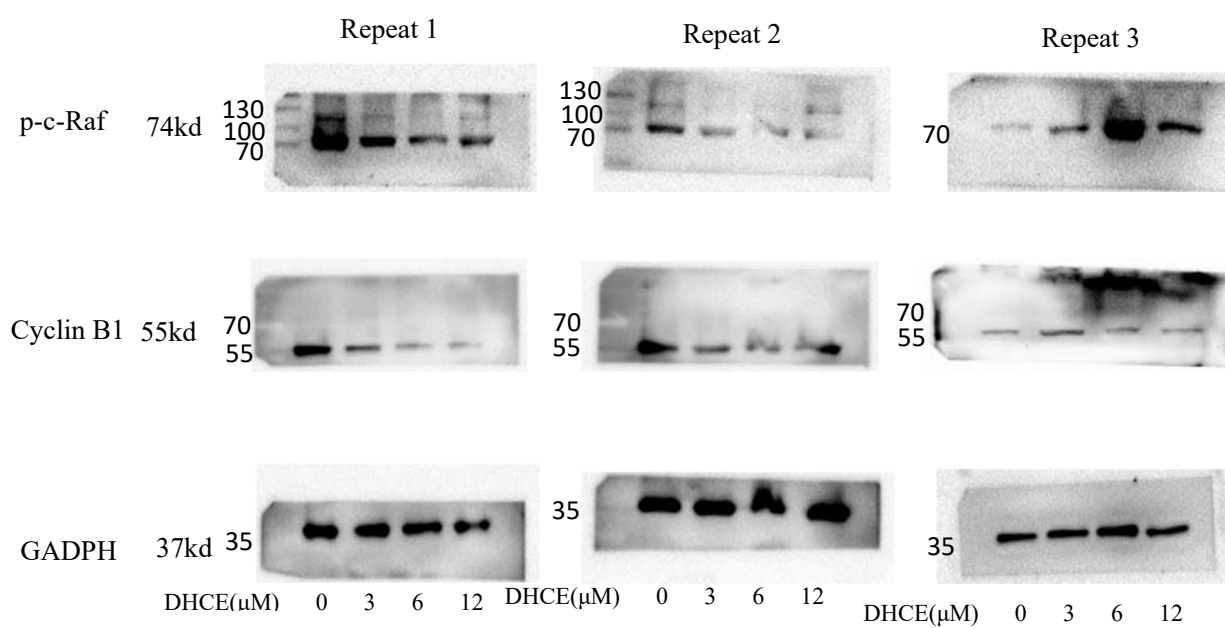

**Figure S4** Original western blots images of p-c-Raf and Cyclin B1 in MGC803 cells (n=3).

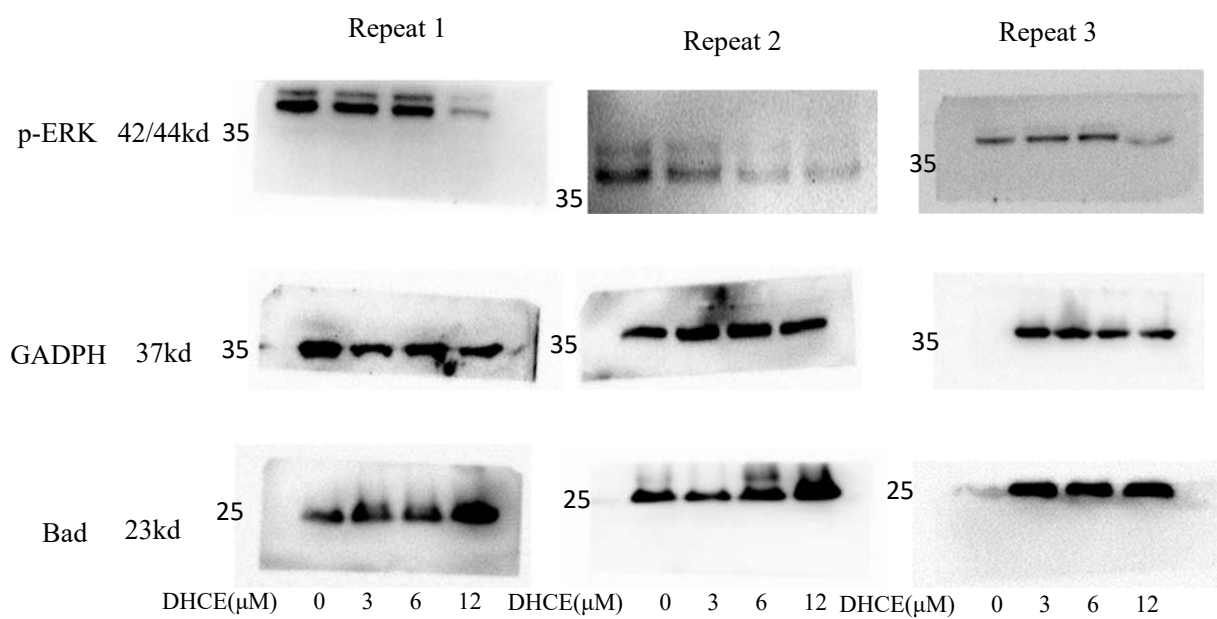

**Figure S5** Original western blots images of p-ERK and Bad in MGC803 cells (n=3).

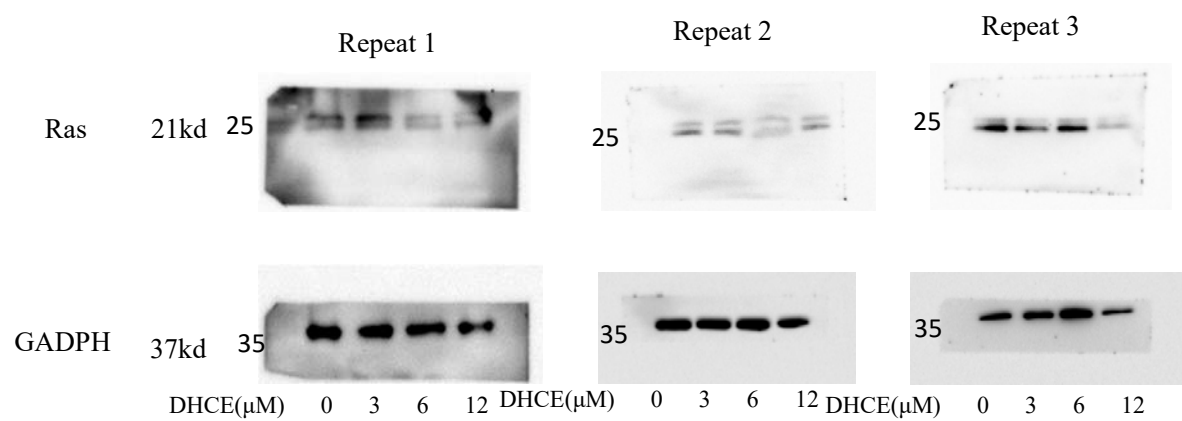

**Figure S6** Original western blots images of Ras in MGC803 cells (n=3).

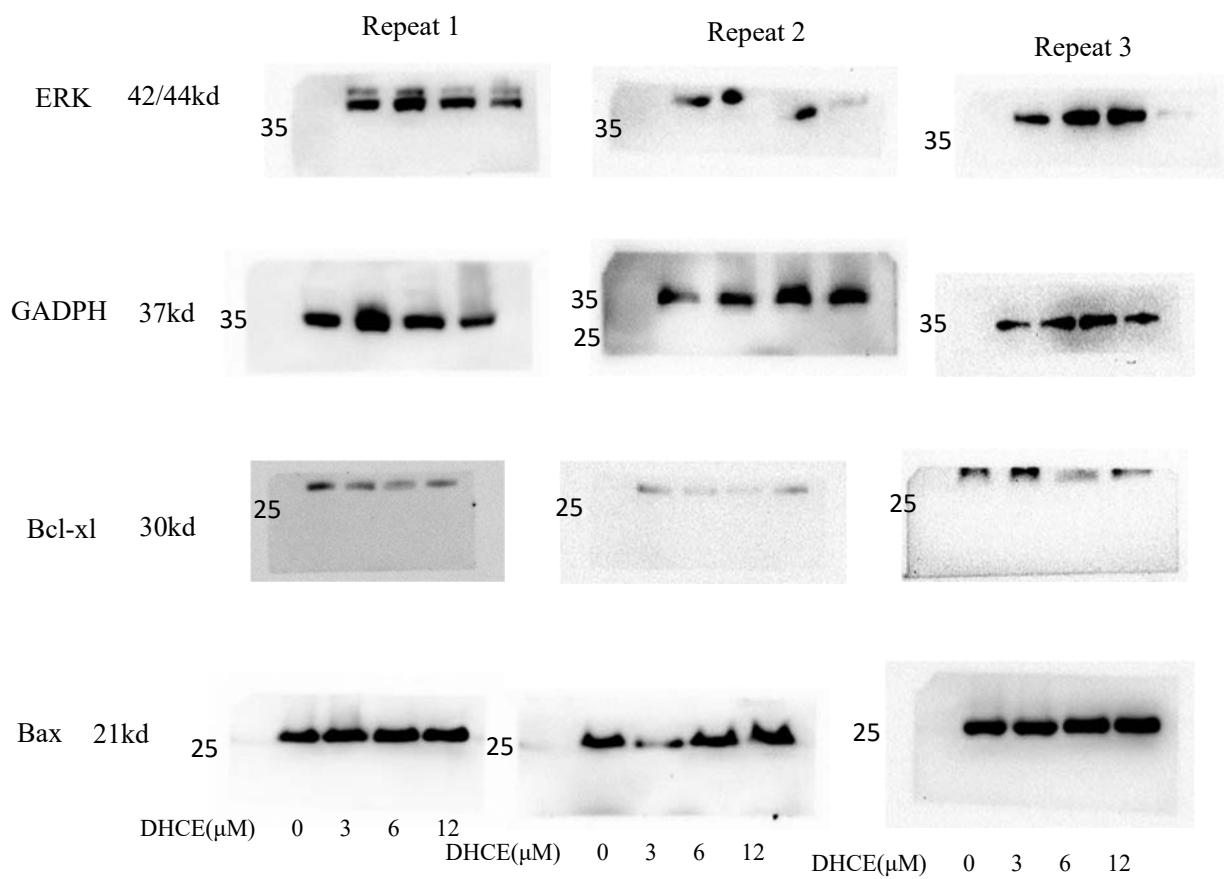

**Figure S7** Original western blots images of ERK, Bcl-xl and Bax in SGC7901 cells (n=3).

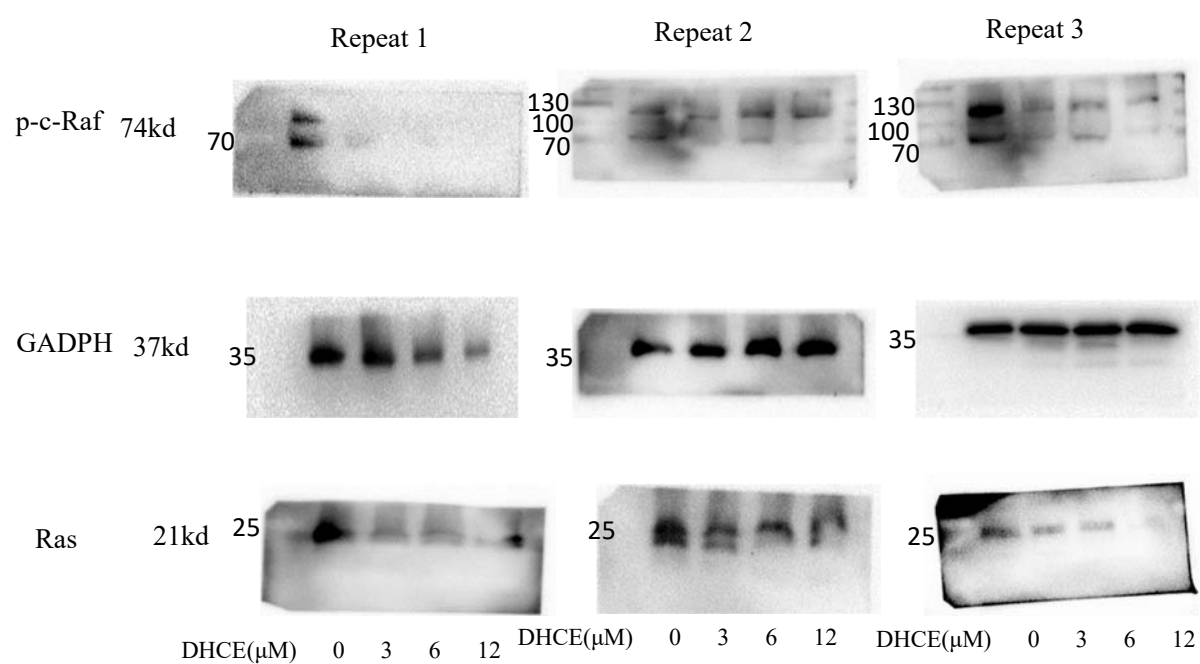

**Figure S8** Original western blots images of p-c-Raf and Ras in SGC7901 cells (n=3).



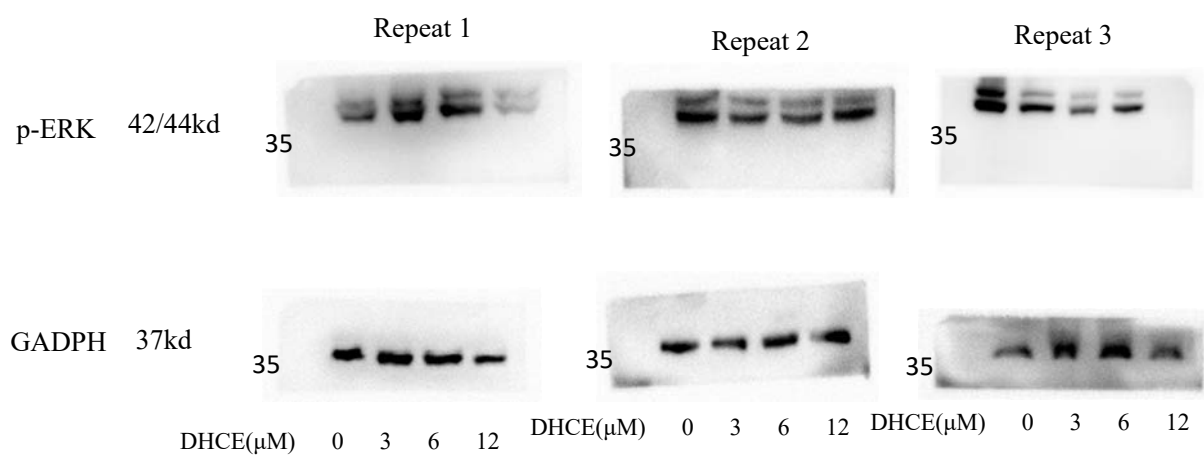

**Figure S9** Original western blots images of p-ERK in SGC7901 cells (n=3).

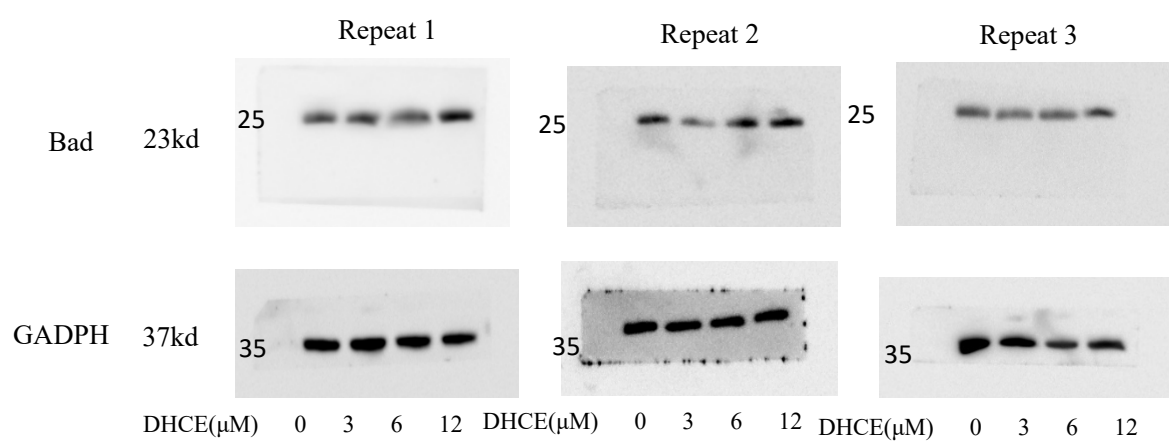

**Figure S10** Original western blots images of Bad in SGC7901 cells (n=3).

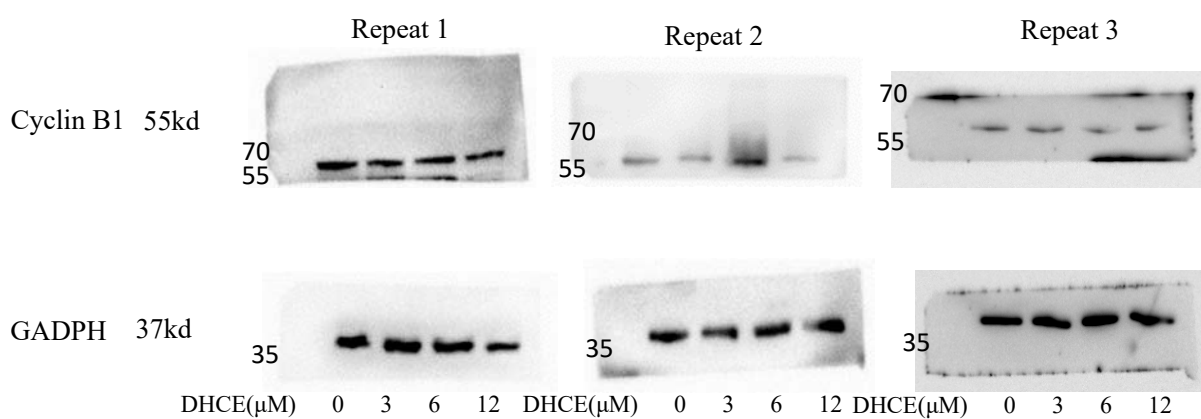

**Figure S11** Original western blots images of Cyclin B1 in SGC7901 cells (n=3).

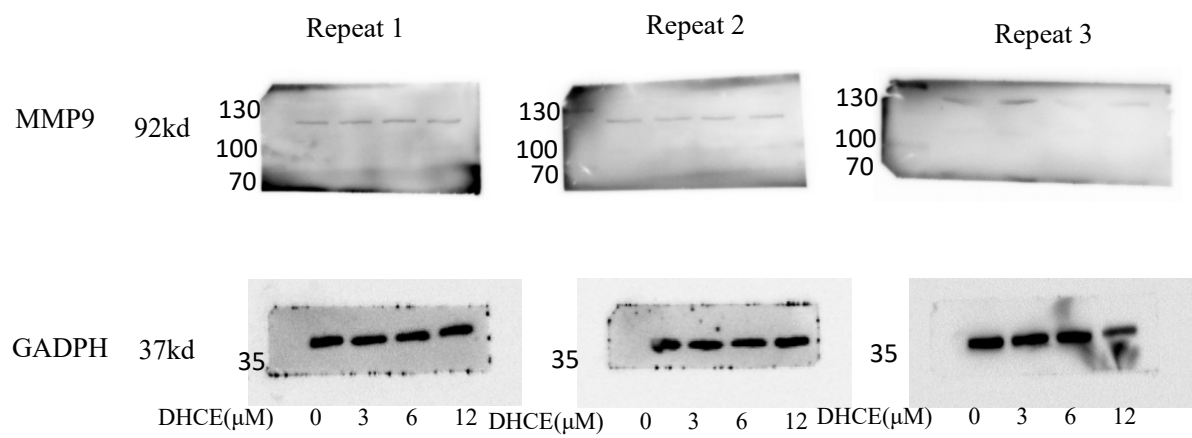

**Figure S12** Original western blots images of MMP9 in SGC7901 cells (n=3).
